# Supplementary material
Source: Springer Nature journal article supplement (https://www.springermedizin.de/resource/supplementary/12985_2009_675_MOESM3_ESM.pdf/9608246)

**A**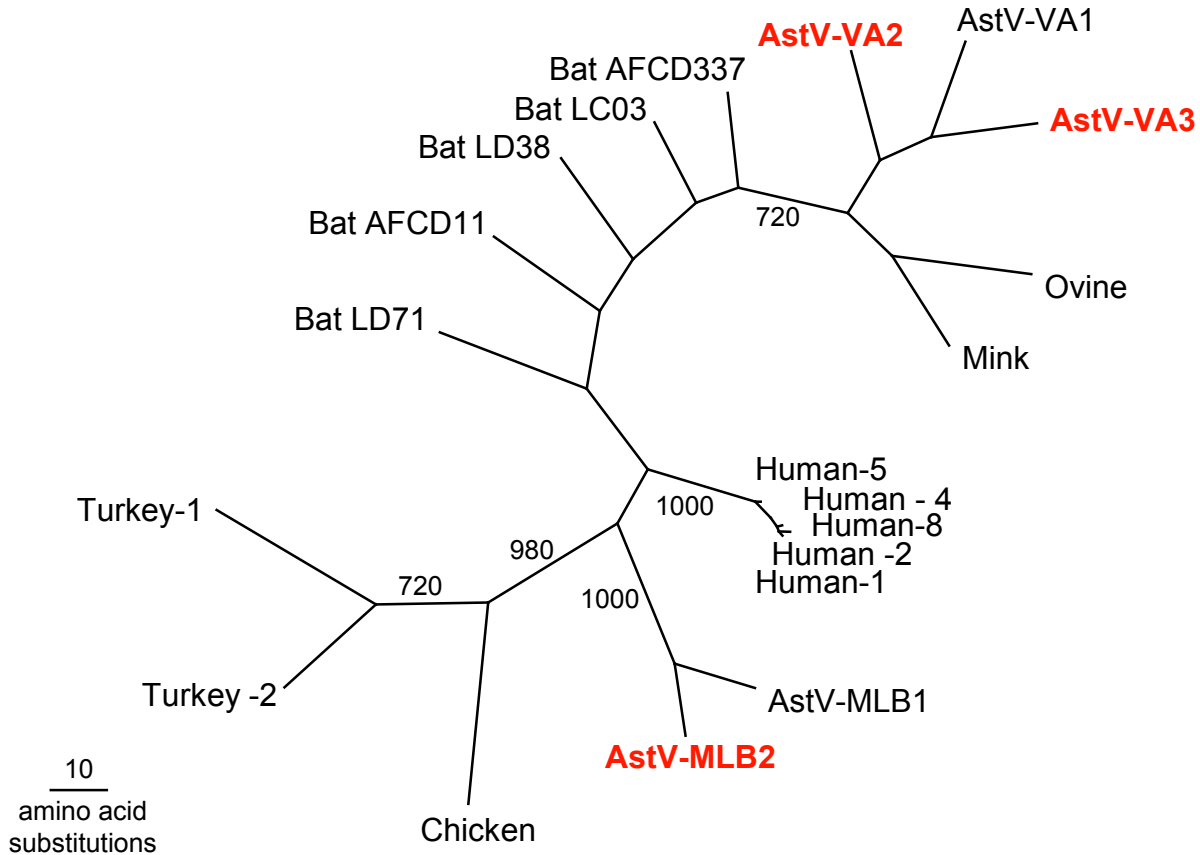**B**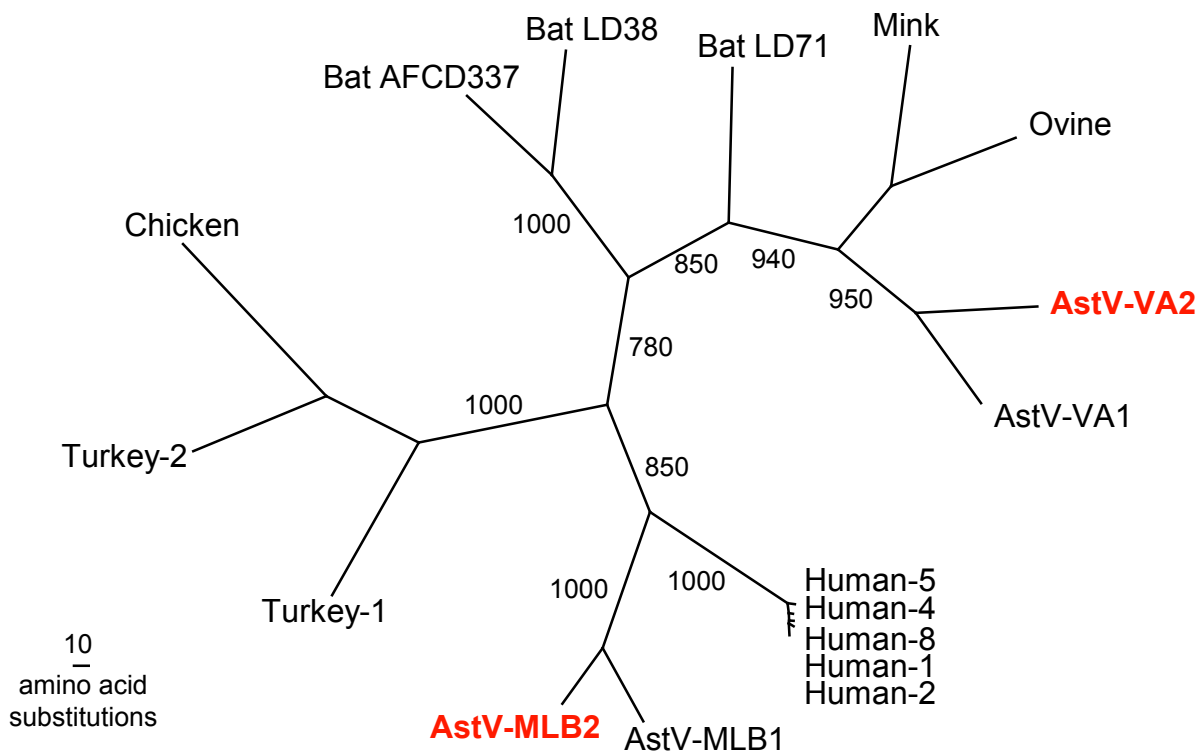

Supplement: MOESM3 [file 9608246]
